# Supplementary material for: Streptococcus uberis strains isolated from the bovine mammary gland evade immune recognition by mammary epithelial cells, but not of macrophages
Source: Springer Nature journal article supplement (doi:10.1186/s13567-015-0287-8), 2016-01-07
Supplement: MOESM5 [file 13567_2015_287_MOESM5_ESM.pdf]

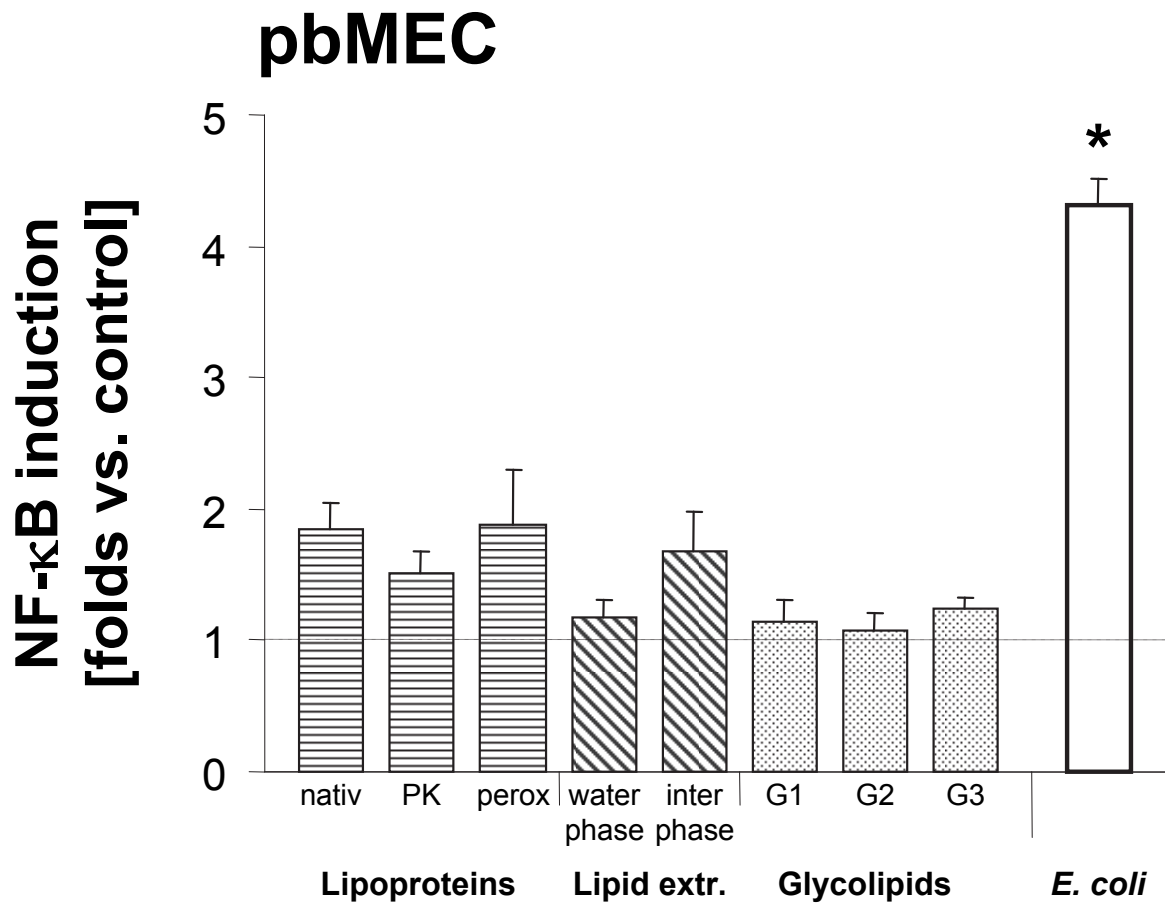

Supplementary figure 2
